# Supplementary material for: A first structural and theoretical comparison of pyridinylidene-type rNHC (remote N-heterocyclic carbene) and NHC complexes of Ni(ii) obtained by oxidative substitution
Source: Royal Society of Chemistry journal article supplement (doi:10.1039/b512419k), 2005-12-01
Supplement: b512419k.pdf [file b512419k.pdf]

Complex 8

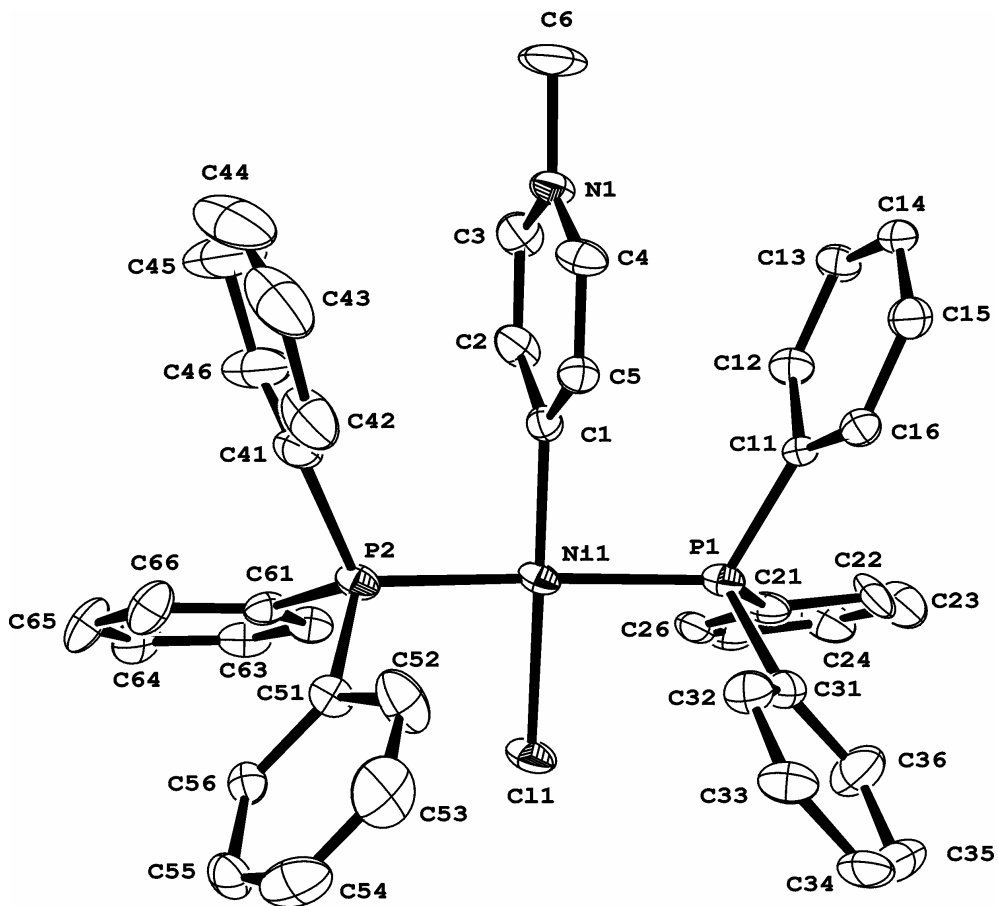

**Table** Selected bond lengths [Å] and angles [°] in **8**

|          |            |          |          |
|----------|------------|----------|----------|
| Ni-C1    | 1.863(5)   | C1-C2    | 1.402(6) |
| Ni-P1    | 2.2216(16) | C2-C3    | 1.359(7) |
| Ni-P2    | 2.2262(15) | C3-N     | 1.342(7) |
| Ni-Cl    | 2.2171(14) | N-C4     | 1.348(6) |
|          |            | C4-C5    | 1.350(7) |
|          |            | C5-C1    | 1.399(7) |
|          |            | C6-N     | 1.484(6) |
| C1-Ni-Cl | 176.15(15) | C5-C1-C2 | 114.9(4) |
| P1-Ni-P2 | 169.53(6)  | C1-C2-C3 | 121.5(5) |
| P1-Ni-Cl | 89.78(16)  | C2-C3-N  | 120.9(5) |
| P2-Ni-Cl | 89.87(16)  | C3-N-C4  | 119.8(4) |
| P1-Ni-Cl | 90.32(6)   | N-C4-C5  | 120.7(5) |
| P2-Ni-Cl | 90.73(5)   | C4-C5-C1 | 122.1(5) |
|          |            | C3-N-C6  | 121.7(5) |
|          |            | C6-N-C4  | 118.4(5) |

Complex 12

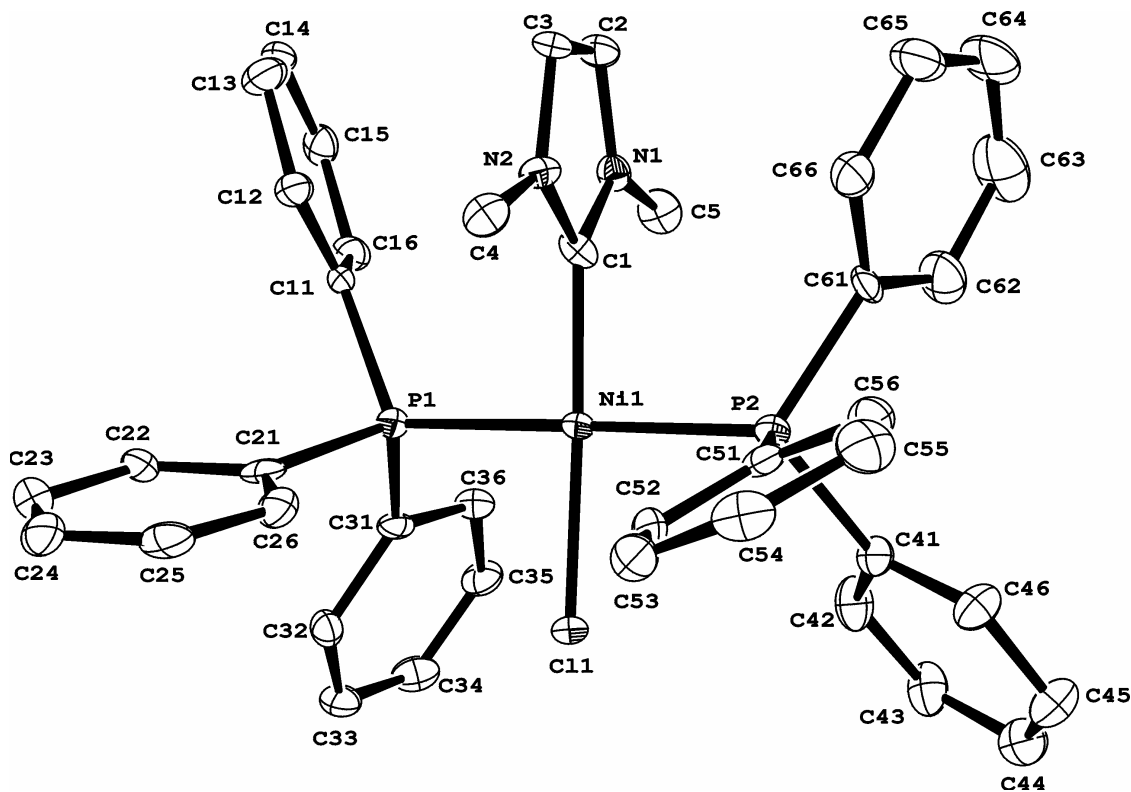

**Table** Selected bond lengths [Å] and angles [°] in 12

|            |          |           |          |
|------------|----------|-----------|----------|
| Ni1-C1     | 1.880(6) | C2-C3     | 1.339(9) |
| Ni1-P1     | 2.236(2) | C3-N2     | 1.380(7) |
| Ni1-P2     | 2.232(2) | N2-C1     | 1.331(7) |
| Ni1-C11    | 2.188(1) | N2-C4     | 1.483(7) |
| C1-N1      | 1.359(7) | N1-C5     | 1.462(8) |
| N1-C2      | 1.361(8) |           |          |
| C1-Ni1-C11 | 175.8(2) | C1-N1-C2  | 110.3(5) |
| P1-Ni1-P2  | 179.1(1) | N1-C2-C3  | 107.6(5) |
| P1-Ni1-C1  | 91.2(2)  | C2-C3-N2  | 106.0(5) |
| P2-Ni1-C1  | 89.5(2)  | C3-N2-C1  | 111.2(5) |
| P1-Ni1-C11 | 88.4(1)  | C1-N1-C5  | 125.5(5) |
| P2-Ni1-C11 | 90.9(1)  | C1-N2-C4  | 125.3(5) |
| N2-C1-N1   | 104.8(5) | Ni1-C1-N1 | 127.3(4) |
|            |          | Ni1-C1-N2 | 127.8(4) |
